# Supplementary material for: Reducing the dehydrogenation temperature of lithium hydride through alloying with germanium
Source: Royal Society of Chemistry journal article supplement (doi:10.1039/c3cp51330k), 2013-01-01
Supplement: c3cp51330k.pdf [file c3cp51330k.pdf]

## Electronic Supplementary Information:

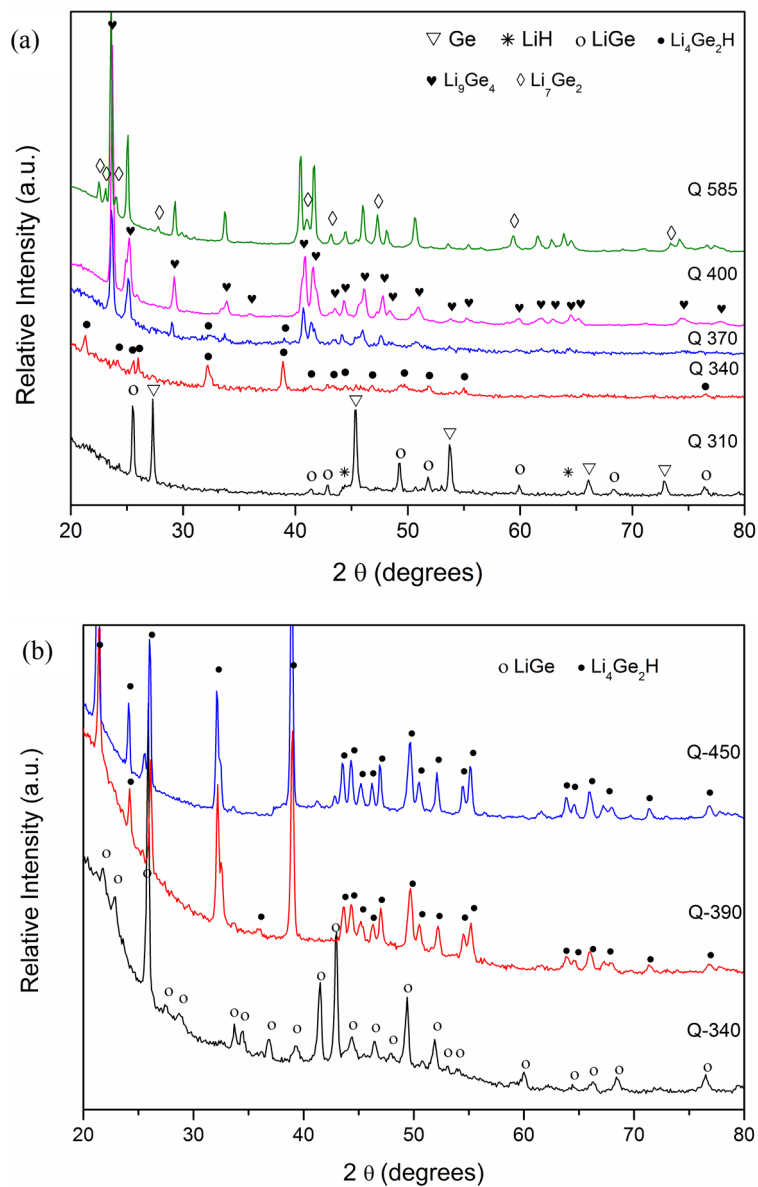

**Figure S1.** *Ex-situ* XRD of DSC products of 3LiH/Ge sample heated to (a) 310 °C, 340 °C, 370 °C, 400 °C, and 585 °C under Ar and (b) 340 °C, 390 °C, and 450 °C under H<sub>2</sub>.

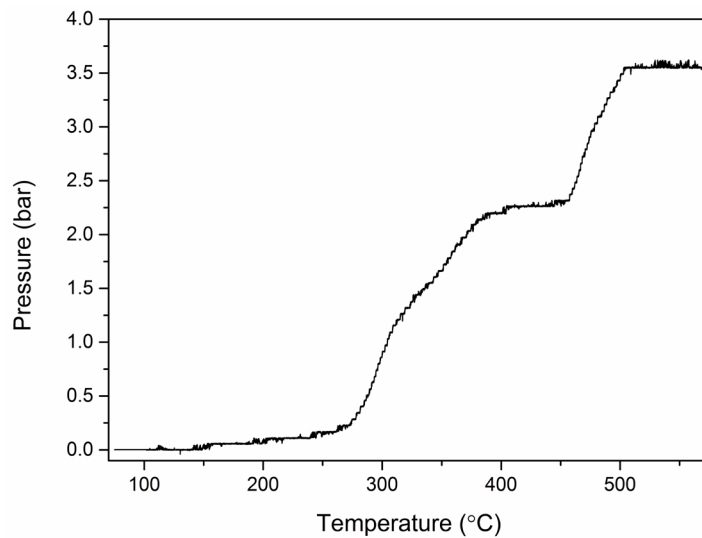

**Figure S2.** Pressure profile of self-generated deuterium gas of 3LiD/Ge sample during heating up to 600 °C carried under static vacuum PND experiment.
